# Supplementary material for: Developing a peptide to disrupt cohesin head domain interactions
Source: PubMed Central journal article supplement (PMC10470313; doi:10.1016/j.isci.2023.107498), 2023-07-28
Supplement: mmc1.pdf [file mmc1.pdf]

**iScience, Volume 26**

## **Supplemental information**

### **Developing a peptide to disrupt cohesin head domain interactions**

**Maria Elias, Samar Gani, Yana Lerner, Katreen Yamin, Chen Tor, Adarsh Patel, Avi Matityahu, Moshe Dessau, Nir Qvit, and Itay Onn**

## Supplemental Information

### Supplementary Figure Legend

**Supplementary Figure S1. Peptide expression from a plasmid containing T2A ribosome-skipping sequence, Related to Figure 2.** **A.** Schematic of protein expression from mRNA containing two open reading frames separated by T2A sequence. **B.** Cells were transformed with pME12 (pGAL-GFP-T2A-mCherry). Cells were grown in SC-URA/raffinose to mid-log phase. The culture was divided in two, with one of the flasks being supplemented with galactose. Cells were grown for an additional 2 hours, fixed, and analyzed by epifluorescence microscopy. **C.** The cells described in B were lysed. The cell extracts were analyzed by Western blot analysis with anti-GFP and anti-mCherry antibodies. **D.** Schematic of CIP3 cloned into pGAL in tandem with GFP and separated by T2A sequence. The arrows indicate the location of the primers used in E. **E.** Fold-change of mRNA of CIP3-T2A-GFP mRNA in cells expression was induced with galactose in comparison to uninduced cells grown in raffinose.

**Supplementary Figure S2. Purification of CIP3-TAT and Smc3 head domain, Related to Figure 3.** **A.** CIP3 was synthesized as described in Materials and Methods and Supplementary Information. HPLC analysis of the peptide after purification is shown. **B.** Mass spectrometry analysis of the purified CIP3-TAT. The expected CIP3-TAT mass of 3447 Da was detected. **C.** Smc3 head was purified as described in Materials and Methods. FT=flowthrough, W1 and W2=washes, E=elution. **D.** The elution fraction of the Smc3 head after the second purification cycle on Ni-NTA agarose column. The eluted proteins were analyzed by SDS-gel electrophoresis stained with Coomassie. The purified Smc3 head domain is indicated by the arrow.

**Supplementary Figure S3. Binding of CIP3-TAT to cohesin by microscale thermophoresis, Related to Figure 3.** 10  $\mu$ M CIP3-TAT was added to protein extracts from strain yAM-945 (Smc3-GFP). The formation of the CIP3-TAT and cohesin complex was analyzed by MST in binding mode. **A.** MST trace. **B.** Binding analysis.

**Supplementary Figure S4. Purification of cohesin holocomplex and loader, Related to Figure 3.** Cohesin holocomplex (Smc1-Smc3-Scc1-Scc3) and the loader (Scc2-Scc4) were expressed and purified as described in Material and Methods. The purified proteins were analyzed on gel, followed by coomassie staining. **A.** The purification of cohesin holocomplex on IgG (lane 1-lysate, 2-flowthrough, 3-wash, 4-elution/heparin input) followed by heparin column (lanes 5-7 are three constitutive elution fractions containing cohesin). **B.** The purification of the loader on IgG (lane 1-lysate, 2-flowthrough, 3-wash, 4-elution/heparin input) followed by heparin column (lanes 5-7 are three constitutive elution fractions containing cohesin)

**Supplementary Figure S5. Delivering peptides into yeast cells, Related to Figure 4.** Strain yIO-001 cells at mid-log phase were treated with 10 mM peptide ContP labeled with FITC for 1 hour at 30 °C. The entry of the peptide into the cells was analyzed by epifluorescence microscopy.

**Supplementary Figure S6. Flow cytometry of cells arrested at different cell cycle stages , Related to Figure 4.** The cell cycle stage of the cells, described in Fig. 4B, was determined by flow cytometry. Asyn.=Asynchronous cells.

Figure S1

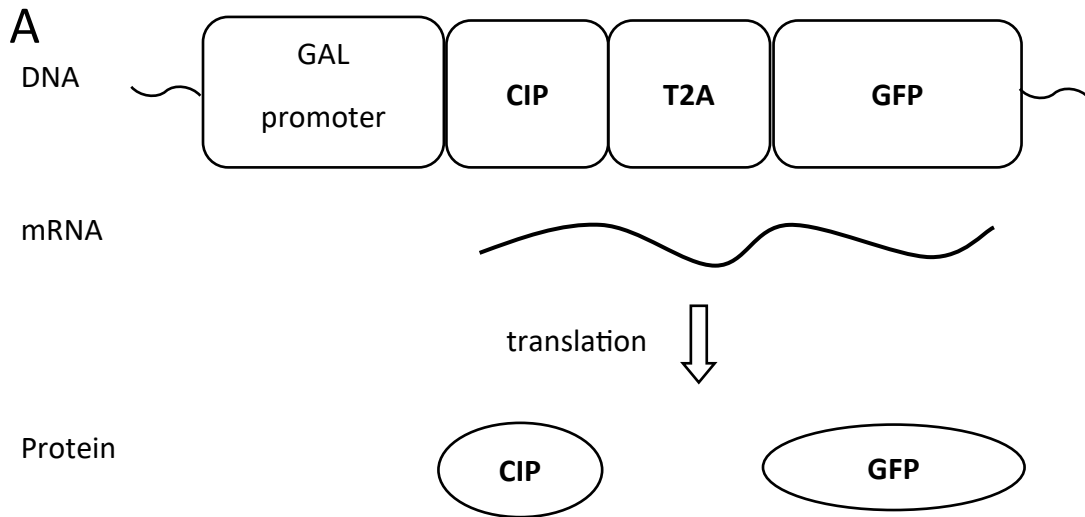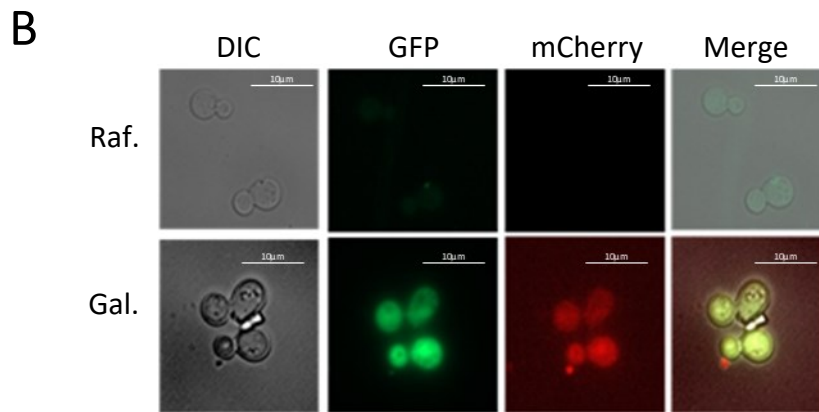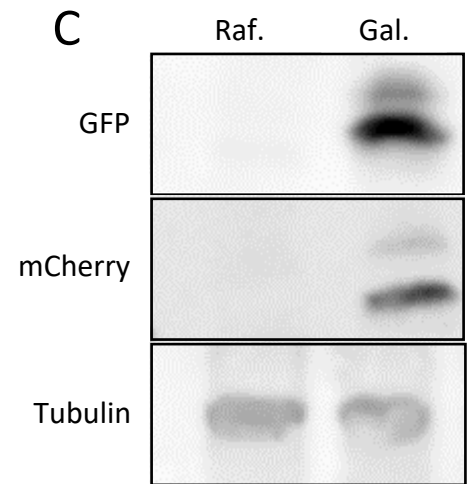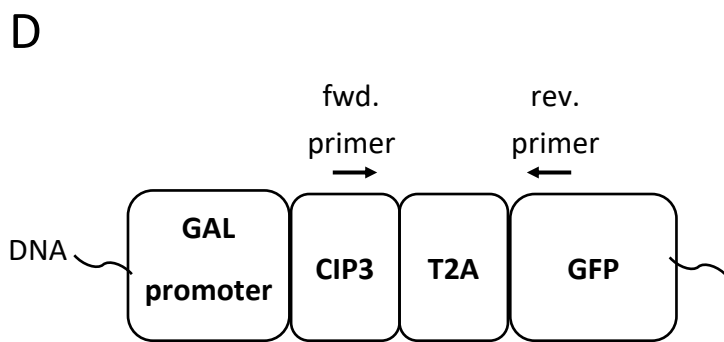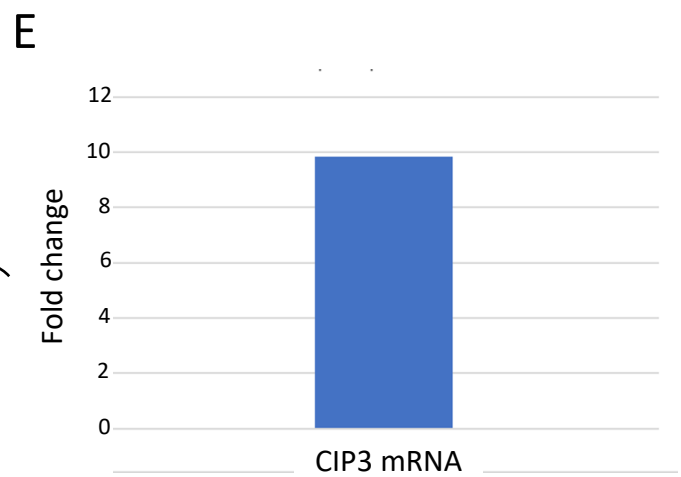

Figure S2

A

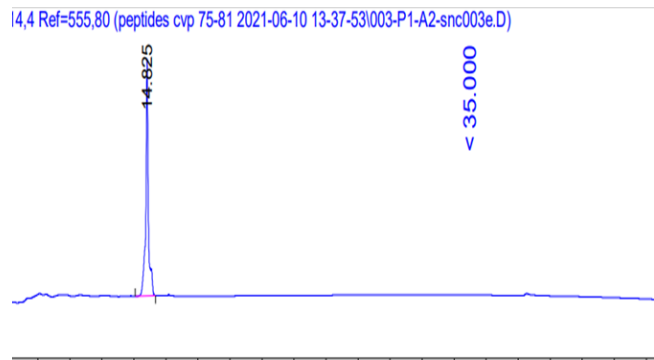

B

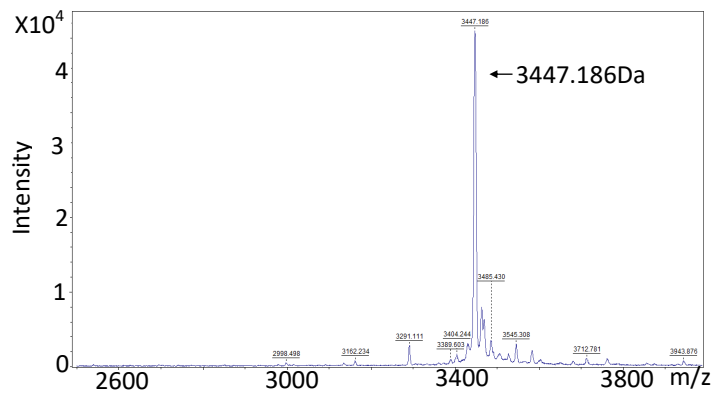

C

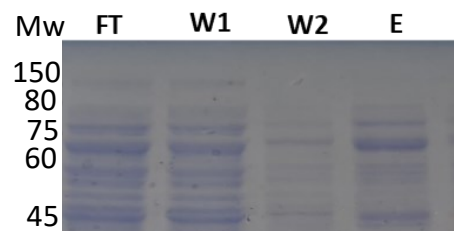

D

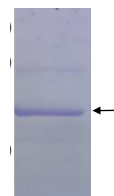

Figure S3

A

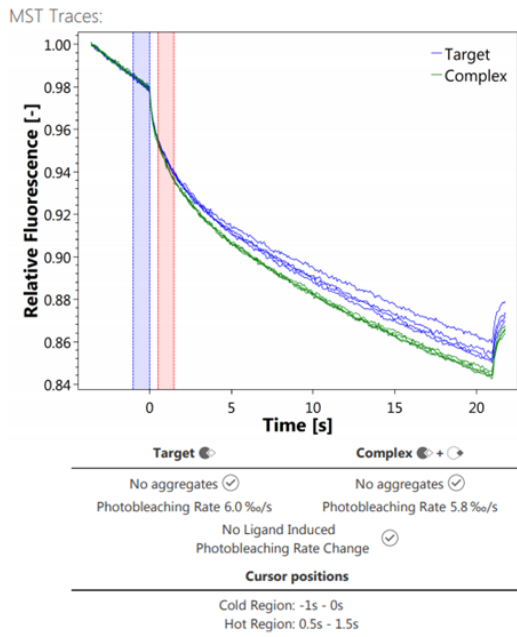

B

Signal to Noise Ratio:

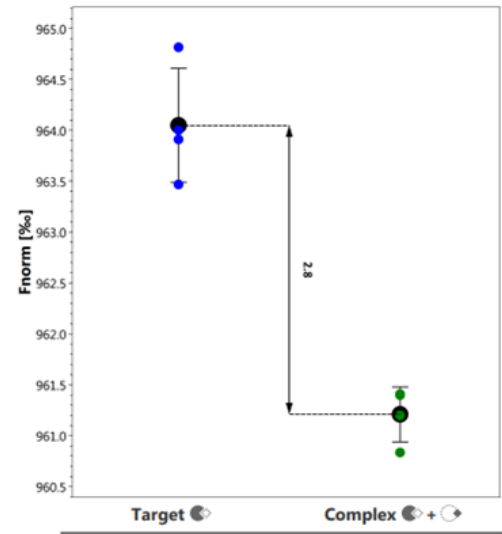

Response Evaluation:

Response:

Noise:

Response Amplitude:

Signal to Noise Ratio:

On Time 1.5s

964

0.6

2.8

6.8

961

0.3

Figure S4

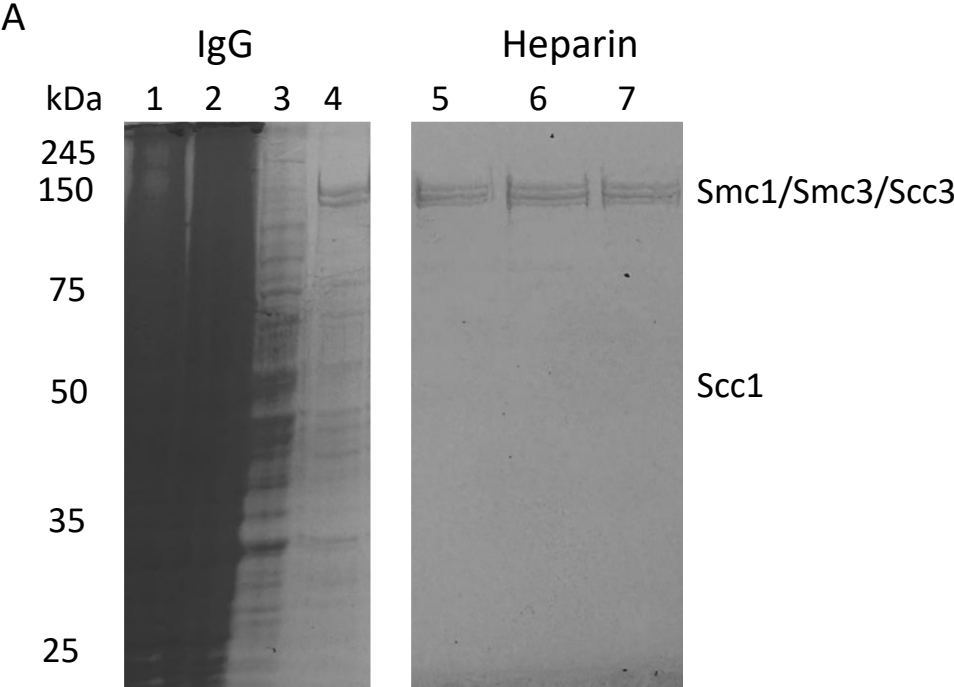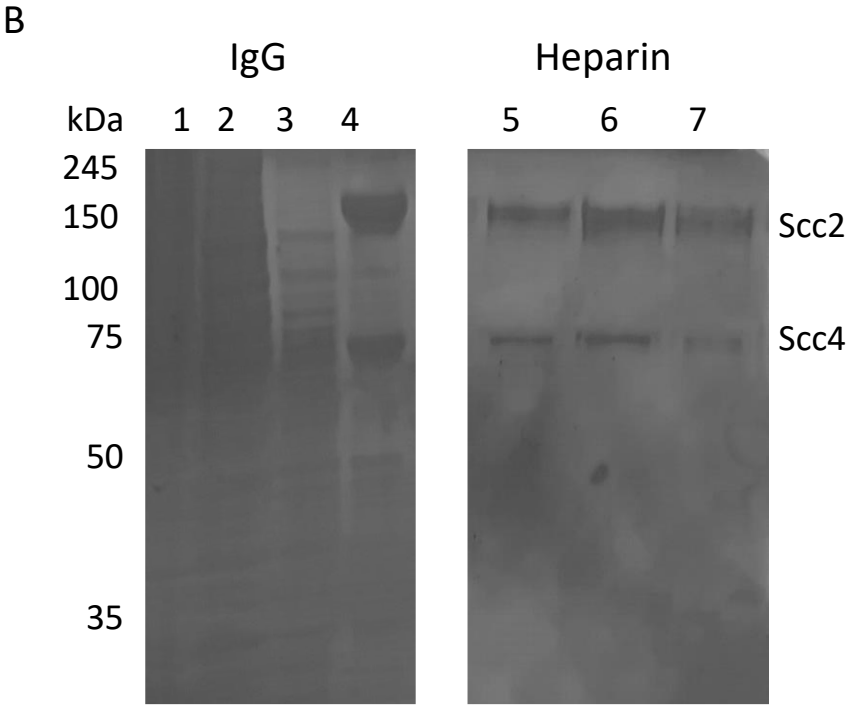

Figure S5

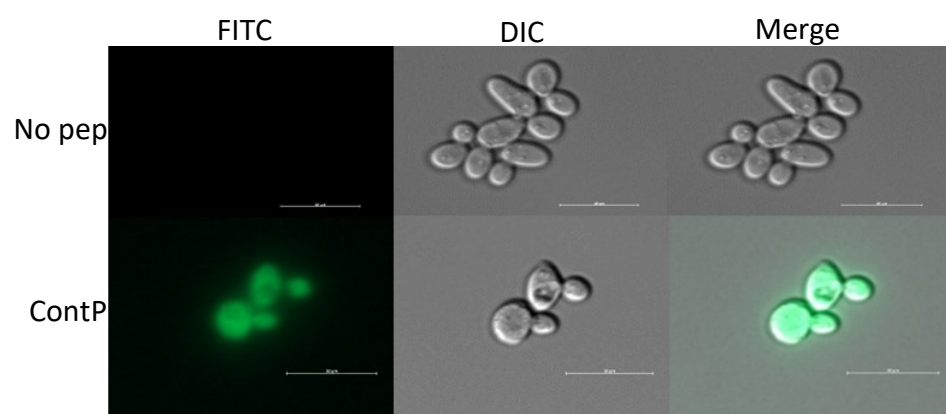



Figure S6

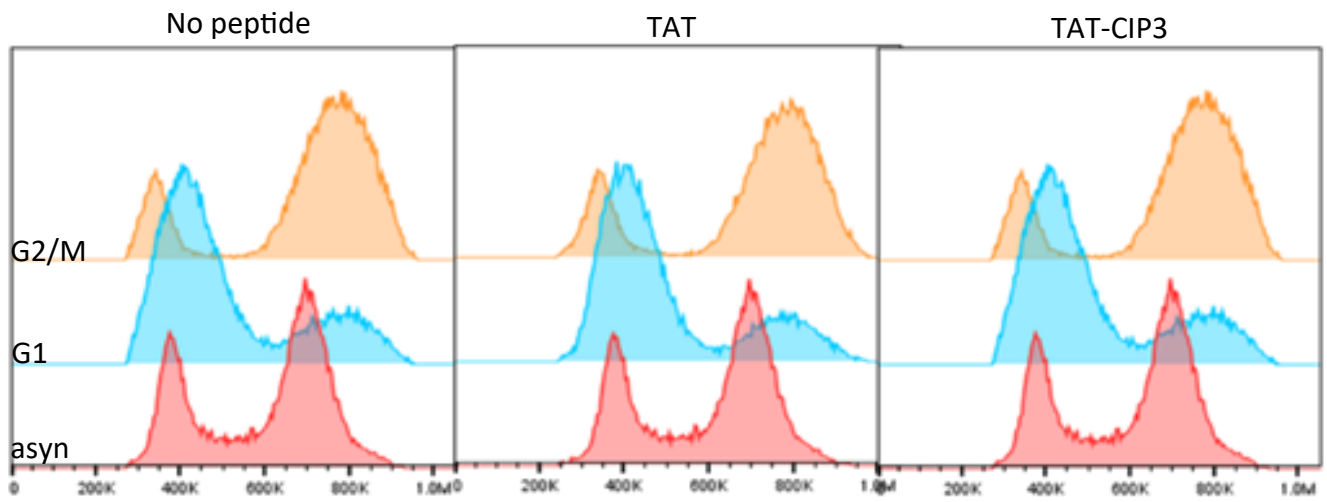

## Supplementary Tables

### Supplementary Table 1. Yeast strains

| Strain   | Description                                                                                |
|----------|--------------------------------------------------------------------------------------------|
| yME-016  | trp1-1 leu2-3,112 ura3-52 his3-11,15 bar1 cloNAT::lys4::LacO GFP-LacI-HIS3 pME3            |
| yME-019  | trp1-1 leu2-3,112 ura3-52 his3-11,15 bar1 cloNAT lys4::LacO GFP-LacI-HIS3 pME4             |
| yME-031  | trp1-1 leu2-3,112 ura3-52 his3-11,15 bar1 cloNAT::lys4::LacO GFP-LacI-HIS3 pME2            |
| yIO-001  | trp1-1 leu2-3,112 ura3-52 his3-11,15 bar1 GAL+                                             |
| yIO-1000 | trp1-1 leu2-3,112 ura3-52 his3-11,15 bar1 GAL+ URA3::pGAL-Scc4                             |
| yME-961  | trp1-1 leu2-3,112 ura3-52 his3-11,15 bar1 GAL+ trp1::LacO::TRP1, his3::LacO-GFP::HIS3      |
| yKS-008  | TRP1 trp1-1 leu2-3,112 ura3-52 his3-11,15 bar1 GAL+ SMC3-V5::G418                          |
| yAM-945  | trp1-1 leu2-3,112 ura3-52 his3-11,15 bar1 GAL+ SMC3-P533-GFP::SMC3                         |
| yME-047  | trp1-1 leu2-3,112 ura3-52 his3-11,15 bar1 cloNAT::lys4::LacO GFP-LacI-HIS3 pAM-84          |
| yME-035  | trp1-1 leu2-3,112 ura3-52 his3-11,15 bar1 cloNAT::lys4::LacO GFP-LacI-HIS3 pAM-84, pME-012 |

**Supplementary Table 2. Plasmid list**

| <b>Plasmid</b> | <b>Insert</b>   | <b>Backbone</b> |
|----------------|-----------------|-----------------|
| pME2           | CIP2            | pRS316          |
| pME3           | CIP3            | pRS316          |
| pME4           | CIP1            | pRS316          |
| pIO-014        | SCC4 / YER147C  | pRS316          |
| pME-012        | GFP-T2A-mCherry | pYC2A           |
| pAM-84         | GFP-T2A-CIP3    | pYC2A           |

**Supplementary Table 3. Primer list**

| Primer     | Direction | Description | Coordinates         | Sequence                      |
|------------|-----------|-------------|---------------------|-------------------------------|
| IO-12-992  | Forward   | ChIP/CEN3   | Chr3:81023-81224    | CTATTTTCGAGACTGGATCCCCGG      |
| IO-12-993  | Reverse   |             | Chr3:81023-81224    | GGAGACTCTTCGATAGGTGCC         |
| IO-6-555   | Forward   |             | Chr3:111232-111376  | GAAGTAATGGAAATGCCCTGATAAA     |
| IO-6-556   | Reverse   |             | Chr3: 111232-111376 | CGTTGAATGATGCCCGTAGTA         |
| IO-3-255   | Forward   | ChIP/CEN4   | Chr4: 4936-5018     | ACACGAGCCAGAAATAGTAAC         |
| IO-3-256   | Reverse   |             | Chr4: 4936-5018     | TGATTATAAGCATGTGACCTTT        |
| IO-3-257   | Forward   |             | Chr4: 5178-5257     | CCGAGGCTTTCATAGCTTA           |
| IO-3-258   | Reverse   |             | Chr4: 5178-5257     | ACCGGAAGGAAGAATAAGAA          |
| IO-8-681   | Forward   | ChIP/rDNA   | Chr12:467512-467797 | AGCCTACTCGAATTCGTTTCC         |
| IO-8-682   | Reverse   |             | Chr12:467512-467797 | ATAGTGAGGAACTGGGTTACC         |
| IO-3-225   | Forward   | ChIP/CARC1  | Chr3:99238-99418    | AGC GGA TCA ATC CAC AAA GC    |
| IO-3-226   | Reverse   |             | Chr3: 99238-99418   | TGC TGT AGT CAC CTC AGC AAG   |
| IO-3-239   | Forward   |             | Chr3:102856-102930  | AAT TCC ACA GTC CCC ATA CCA C |
| IO-3-240   | Reverse   |             | Chr3: 102856-102930 | TAC AGT GGG CGA AGT TGT GG    |
| IO-14-1209 | Forward   | qPCR/pAM-84 | N/A                 | GATTCAAAGACATGG               |
| IO-14-1211 | Reverse   |             | N/A                 | CATCACCATCTAATT               |
